# Supplementary material for: Activation of the Aryl Hydrocarbon Receptor Dampens the Severity of Inflammatory Skin Conditions
Source: PubMed Central journal article supplement (PMC4067745; doi:10.1016/j.immuni.2014.04.019), 2014-06-19
Supplement: mmc1.pdf [file mmc1.pdf]

**Immunity, Volume 40**

**Supplemental Information**

## **Activation of the Aryl Hydrocarbon Receptor**

### **Dampens the Severity of Inflammatory Skin Conditions**

**Paola Di Meglio, João H. Duarte, Helena Ahlfors, Nick D.L. Owens, Ying Li, Federica Villanova, Isabella Tosi, Keiji Hirota, Frank O. Nestle, Ulrich Mrowietz, Michael J. Gilchrist, and Brigitta Stockinger**

**Di Meglio et al.**

**Supplemental Information**

**Inventory:**

Supplemental Data

Supplemental Table 1, related to Figure 1

Supplemental Table 2, related to Figure 1

Supplemental Table 3, related to Figure 1

Supplemental Figure 1, related to Figure 1

Supplemental Figure 2, related to Figure 2

Supplemental Figure 3, related to Figure 3

Supplemental Figure 4, related to Figure 4

Supplemental Figure 5, related to Figure 6

Supplemental Figure 6, related to Figure 7

Supplemental Experimental Procedures

Supplemental References

Table S1

| Sample ID | Age (yrs) | Gender | PASI | Age of Onset | Treatment                  |
|-----------|-----------|--------|------|--------------|----------------------------|
| H1        | 54        | F      | NA   | NA           | NA                         |
| H2        | 53        | F      | NA   | NA           | NA                         |
| H3        | 74        | F      | NA   | NA           | NA                         |
| H4        | 36        | F      | NA   | NA           | NA                         |
| H5        | 37        | F      | NA   | NA           | NA                         |
| P1        | 56        | M      | 4.2  | 35           | topical steroids+Vitamin D |
| P2        | 52        | M      | 7.9  | 51           | topical steroids+Vitamin D |
| P3        | 63        | F      | 4.1  | 53           | topical steroids+Vitamin D |
| P4        | 56        | F      | 2.8  | 31           | topical steroids+Vitamin D |
| P5        | 30        | M      | 12.5 | 24           | topical steroids           |
| P6        | 56        | F      | 4.2  | 53           | topical Vitamin D          |
| P7        | 60        | M      | 15.6 | 44           | topical steroids+Vitamin D |
| P8        | 45        | M      | 9.6  | 38           | topical steroids+Vitamin D |

**Table S1 related to Fig.1:** Demographics of healthy donors (H) and psoriasis patients (P). PASI: Psoriasis Area Severity Index; NA: Not applicable

Table S2

| Increased expression in Lesional Skin |             |          |          | Decreased expression in Lesional Skin |             |          |          |
|---------------------------------------|-------------|----------|----------|---------------------------------------|-------------|----------|----------|
| Gene                                  | FC: L vs NL | p        | FDR      | Gene                                  | FC: L vs NL | p        | FDR      |
| S100A9                                | 113.785     | 2.41E-73 | 4.37E-69 | ZSCAN18                               | 0.273345    | 4.96E-52 | 3.15E-48 |
| S100A8                                | 105.068     | 2.76E-73 | 4.37E-69 | PHF17                                 | 0.386304    | 7.10E-41 | 2.51E-37 |
| TCN1                                  | 192.55      | 9.32E-71 | 9.86E-67 | IL37                                  | 0.0528742   | 6.59E-38 | 1.90E-34 |
| TPBG                                  | 3.75752     | 3.61E-56 | 2.86E-52 | TMEM99                                | 0.264457    | 2.18E-37 | 5.76E-34 |
| S100A7A                               | 1050.83     | 2.37E-48 | 1.25E-44 | RP11-54F2.1                           | 0.137792    | 1.33E-32 | 2.49E-29 |
| C10orf99                              | 15.8586     | 7.96E-45 | 3.61E-41 | AQP9                                  | 0.127827    | 1.54E-31 | 2.57E-28 |
| GJB2                                  | 17.0579     | 5.51E-42 | 2.19E-38 | RORC                                  | 0.129265    | 2.84E-31 | 4.29E-28 |
| ADAMDEC1                              | 19.2404     | 1.10E-39 | 3.50E-36 | C1orf95                               | 0.207568    | 1.96E-29 | 2.59E-26 |
| KYNU                                  | 30.0741     | 2.19E-36 | 5.35E-33 | F3                                    | 0.188385    | 2.12E-29 | 2.69E-26 |
| GLYCTK                                | 2.59476     | 6.06E-36 | 1.37E-32 | C7orf41                               | 0.392176    | 2.24E-28 | 2.73E-25 |
| FAM110C                               | 3.86474     | 9.93E-33 | 2.05E-29 | ZNF134                                | 0.571151    | 2.92E-28 | 3.44E-25 |
| CXCR6                                 | 8.189       | 1.03E-32 | 2.05E-29 | KRT77                                 | 0.0426745   | 6.26E-28 | 7.10E-25 |
| S100A7                                | 62.428      | 9.70E-32 | 1.71E-28 | CDH20                                 | 0.188352    | 3.31E-27 | 3.39E-24 |
| S100A12                               | 155.573     | 1.92E-31 | 3.04E-28 | ANKRD33B                              | 0.123088    | 6.69E-27 | 6.44E-24 |
| IRAK2                                 | 3.02766     | 5.24E-31 | 7.57E-28 | HS3ST6                                | 0.099026    | 3.41E-26 | 3.00E-23 |
| PLBD1                                 | 3.58343     | 1.10E-29 | 1.52E-26 | GJB4                                  | 0.0621355   | 1.61E-25 | 1.33E-22 |
| PI3                                   | 172.237     | 9.53E-28 | 1.04E-24 | ACAT1                                 | 0.522441    | 1.64E-25 | 1.33E-22 |
| TRIM14                                | 2.74193     | 2.52E-27 | 2.67E-24 | WNK2                                  | 0.152976    | 2.46E-25 | 1.91E-22 |
| ARNTL2                                | 3.4689      | 3.63E-27 | 3.60E-24 | RAB3B                                 | 0.0944153   | 3.38E-25 | 2.49E-22 |
| CCRN4L                                | 3.04026     | 7.40E-27 | 6.91E-24 | RGMB                                  | 0.346188    | 3.68E-25 | 2.65E-22 |
| MPZL2                                 | 4.98868     | 8.31E-27 | 7.53E-24 | CLDN1                                 | 0.283213    | 7.86E-25 | 5.20E-22 |
| PRKCQ                                 | 11.3831     | 8.95E-26 | 7.68E-23 | UGT3A2                                | 0.032518    | 9.23E-25 | 5.98E-22 |
| CHFR                                  | 1.4794      | 2.22E-25 | 1.76E-22 | IGFL3                                 | 0.308453    | 1.31E-24 | 8.31E-22 |
| ABCG4                                 | 25.4933     | 3.16E-25 | 2.38E-22 | SOX5                                  | 0.264699    | 1.44E-24 | 8.98E-22 |
| TMPRSS11D                             | 81.6717     | 3.92E-25 | 2.77E-22 | ANKH                                  | 0.51391     | 4.68E-24 | 2.61E-21 |

**Table S2 related to Fig.1:** Top 25 most significantly up- (left) and down-(right) regulated genes in lesional (L) *versus* non lesional (NL) psoriasis skin. FC: Fold Change; FDR: False Discovery Rate

Table S3

| Gene       | p: L+Ag    | p: L+Ant    | p: NL+Ag    | p: NL+Ant   | p: H+Ag    | p: H+Ant  | FC: L+Ag | FC: L+Ant | FC: NL+Ag | FC: NL+Ant | FC: H+Ag | FC: H+Ant | FC: L vs H | FC: NL vs H | p: L vs NL  | FDR: L vs NL |
|------------|------------|-------------|-------------|-------------|------------|-----------|----------|-----------|-----------|------------|----------|-----------|------------|-------------|-------------|--------------|
| IFIT1      | 3.48E-03   | 0.0108741   | 0.01709266  | 0.000227536 | 0.02252562 | 0.4007104 | 4.67802  | 4.67802   | 0.521284  | 0.299311   | 1.65426  | 3.98471   | 4.12642    | 1.03556     | 0.010481    | 0.0483474    |
| R5AD2      | 0.0125038  | 0.0475      | 0.0059989   | 0.00657162  | 0.00647929 | 0.837316  | 3.18077  | 3.18077   | 0.355403  | 4.62689    | 0.141145 | 1.16174   | 6.30058    | 1.02948     | 0.00259334  | 0.015029     |
| IFIT3      | 0.0178354  | 0.008592    | 0.034997    | 0.00110344  | 0.542856   | 0.428298  | 4.28298  | 4.28298   | 0.579456  | 4.00026    | 0.261064 | 1.45715   | 3.2806     | 0.65821     | 0.000493625 | 0.0038706    |
| CMPK2      | 5.75E-03   | 0.0307245   | 3.27E-02    | 0.000629602 | 1.85E-02   | 0.349753  | 4.116324 | 2.89875   | 0.620467  | 3.15291    | 0.313114 | 1.66452   | 5.70972    | 0.867287    | 0.000482138 | 0.0039072    |
| NX2        | 0.00441559 | 0.015765    | 0.000402428 | 0.000383315 | 0.0769318  | 0.86643   | 4.40633  | 2.90389   | 0.571176  | 2.98689    | 0.432097 | 1.57498   | 2.57779    | 0.907883    | 1.75E-03    | 1.13E-02     |
| CXCL11     | 0.0787357  | 0.0260271   | 0.0533645   | 0.0049604   | 0.0098604  | 0.850044  | 0.58349  | 4.89391   | 0.324167  | 2.91547    | 0.10063  | 1.16908   | 4.28917    | 1.50311     | 0.0137723   | 0.0601424    |
| ISG15      | 0.0526282  | 0.01692     | 0.024408    | 0.000277227 | 0.00478694 | 0.850044  | 0.58349  | 4.89391   | 0.324167  | 2.91547    | 0.10063  | 1.16908   | 4.28917    | 1.50311     | 0.0137723   | 0.0601424    |
| BATF2      | 0.0376235  | 0.0168463   | 0.0416507   | 0.0184969   | 0.0235779  | 0.398252  | 0.632511 | 1.68586   | 0.650493  | 1.91794    | 0.417733 | 1.47454   | 7.88844    | 1.17525     | 2.14E-09    | 8.48E-08     |
| USP18      | 0.0900872  | 0.0201236   | 0.16888     | 0.00039072  | 0.0219202  | 0.351794  | 0.682313 | 2.5312    | 0.789233  | 2.66803    | 1.56978  | 2.33296   | 2.89589    | 1.21557     | 0.00191217  | 0.0120768    |
| EPST11     | 0.0533567  | 0.0329777   | 0.200401    | 0.0106382   | 0.119217   | 0.659919  | 1.9546   | 0.654929  | 1.9546    | 0.750517   | 0.536965 | 1.45666   | 4.04371    | 0.785849    | 2.85E-07    | 6.56E-05     |
| NX1        | 0.155754   | 0.0245886   | 0.172298    | 0.00371374  | 0.0597084  | 0.349753  | 4.116324 | 2.89875   | 0.620467  | 3.15291    | 0.313114 | 1.66452   | 5.70972    | 0.867287    | 0.000493625 | 0.0038706    |
| HERC5      | 0.0490263  | 0.0153939   | 0.107631    | 0.00198939  | 0.0431622  | 0.412223  | 0.66048  | 2.33987   | 0.767212  | 2.13846    | 0.488092 | 1.43281   | 1.44528    | 0.945444    | 1.23E-06    | 2.95E-05     |
| SAMD9L     | 0.0719868  | 0.0139822   | 0.169397    | 0.006327813 | 0.0738712  | 0.62234   | 0.660822 | 2.45866   | 0.786835  | 2.1843     | 0.549905 | 1.25636   | 1.88143    | 0.894211    | 1.48E-06    | 2.77E-05     |
| OAS2       | 0.134484   | 0.03811     | 0.171003    | 0.00844379  | 0.0339668  | 0.34688   | 0.664964 | 2.07892   | 0.691782  | 2.47631    | 0.432752 | 1.53101   | 12.1097    | 9.52759     | 3.50E-06    | 5.84E-05     |
| OAS3       | 0.0859894  | 0.0415883   | 0.285737    | 0.00674979  | 0.0480101  | 0.475588  | 0.726269 | 1.76326   | 0.810531  | 2.00849    | 0.520991 | 1.29722   | 5.8755     | 6.44058     | 1.22E-15    | 1.76E-13     |
| OAS1       | 0.20419    | 0.0480811   | 0.358342    | 0.0175433   | 0.0375915  | 0.276218  | 0.751428 | 1.8323    | 0.831491  | 1.79828    | 0.539406 | 1.47208   | 4.36701    | 5.42686     | 2.02E-06    | 3.61E-05     |
| IFI35      | 0.1453927  | 0.0161809   | 0.468571    | 0.00473355  | 0.00870422 | 0.346032  | 0.752037 | 2.26911   | 0.895073  | 1.93239    | 0.511845 | 1.36559   | 1.47068    | 1.63651     | 0.000363791 | 0.0030786    |
| SAMHD1     | 0.145706   | 0.0190059   | 6.44E-01    | 0.00764016  | 0.156807   | 0.519317  | 0.76536  | 1.76536   | 0.891706  | 1.88208    | 0.609311 | 1.31541   | 1.73972    | 0.858043    | 0.493209    | 2.54E-06     |
| DDX58      | 0.175983   | 0.0150247   | 0.0923704   | 0.0024866   | 0.0816288  | 0.667979  | 0.753736 | 2.24734   | 0.802057  | 1.84373    | 0.634436 | 1.7508    | 2.43703    | 1.10935     | 0.000123005 | 0.00124191   |
| CXCL10     | 0.487771   | 0.0032835   | 0.015834    | 0.00924241  | 0.0021157  | 0.928375  | 0.93966  | 3.52321   | 0.274128  | 4.07689    | 0.039647 | 1.08999   | 4.21451    | 0.87399     | 0.26E-04    | 2.80E-03     |
| IFIH1      | 0.152304   | 0.0311479   | 0.125576    | 0.00158227  | 0.389726   | 0.379979  | 0.810979 | 1.66286   | 0.839452  | 1.79596    | 0.826243 | 1.37541   | 1.7717     | 0.870465    | 0.000172904 | 0.00165117   |
| IFIT1      | 0.240949   | 0.0207676   | 0.0581865   | 0.00576315  | 0.0889081  | 0.594458  | 0.826696 | 1.60736   | 0.790982  | 1.54665    | 0.635887 | 1.22203   | 2.7494     | 0.983168    | 3.66E-07    | 8.16E-06     |
| PARP9      | 0.483088   | 0.0495434   | 0.550367    | 0.0263906   | 0.283422   | 0.699644  | 0.885571 | 1.58936   | 0.909073  | 1.53066    | 0.774291 | 1.12674   | 3.46242    | 0.925403    | 1.31E-13    | 1.29E-11     |
| TRIM21     | 0.421847   | 0.0361962   | 0.8446      | 0.0100575   | 0.0988905  | 0.172658  | 0.898907 | 1.44382   | 0.987141  | 1.31866    | 0.813844 | 1.26434   | 1.746      | 0.911378    | 1.07E-07    | 2.76E-06     |
| SP100      | 0.297059   | 0.0379078   | 0.736989    | 0.0171899   | 0.978099   | 0.720029  | 0.907692 | 1.28074   | 0.977784  | 1.2972     | 0.986368 | 1.07463   | 1.58434    | 1.08325     | 1.46E-04    | 1.43E-03     |
| PML        | 5.14E-01   | 0.0360827   | 5.45E-01    | 0.0357884   | 0.00216225 | 0.67597   | 0.947273 | 1.1998    | 0.951043  | 1.24419    | 0.730519 | 1.05116   | 1.90067    | 1.03424     | 1.11E-14    | 1.36E-12     |
| ABCA12     | 0.871755   | 0.0415706   | 0.567731    | 0.024466    | 0.052466   | 0.776857  | 0.975855 | 0.781377  | 1.06889   | 0.738881   | 1.02829  | 0.947053  | 2.40866    | 0.922914    | 1.42E-08    | 4.85E-07     |
| CERS3      | 0.800371   | 0.0470067   | 0.68809     | 0.0455622   | 0.760594   | 0.507273  | 0.98282  | 0.838116  | 1.03718   | 0.794505   | 0.968676 | 1.00978   | 1.71202    | 1.80434     | 5.52E-07    | 1.16E-05     |
| MAP3K9     | 0.840543   | 0.00437561  | 0.697828    | 0.00437561  | 0.697828   | 0.853444  | 0.988056 | 0.683579  | 1.04274   | 0.764078   | 0.97056  | 1.00978   | 1.71202    | 1.80434     | 5.52E-07    | 1.16E-05     |
| ITSN2      | 0.862977   | 0.0262858   | 0.718483    | 0.0345619   | 0.301638   | 0.446254  | 1.01603  | 0.867357  | 1.02797   | 0.843763   | 1.12187  | 0.844362  | 2.09055    | 1.1484      | 1.49E-13    | 1.45E-11     |
| PNPT1      | 0.798705   | 0.0434721   | 0.72886     | 0.0063737   | 0.388444   | 0.660447  | 1.03467  | 1.50751   | 0.963264  | 1.54112    | 0.822087 | 1.15757   | 1.62388    | 1.00556     | 0.000670717 | 0.0051315    |
| SDRC7      | 0.57351    | 0.0037752   | 0.27857     | 0.00643368  | 0.61257    | 0.568835  | 1.03368  | 0.673535  | 1.1808    | 0.642406   | 0.93203  | 0.923249  | 2.07802    | 0.942974    | 2.84E-07    | 6.54E-06     |
| EPN3       | 0.681481   | 0.0308122   | 0.0381057   | 0.0271062   | 0.11925    | 0.931338  | 1.10236  | 0.700177  | 1.29464   | 0.747489   | 0.784158 | 1.01736   | 1.84926    | 1.0562      | 6.74E-03    | 3.38E-02     |
| C17orf109  | 0.0388934  | 0.187718    | 0.00885653  | 0.000135386 | 0.353822   | 0.185742  | 1.40405  | 0.832305  | 1.42898   | 0.614318   | 0.827568 | 0.74017   | 1.4519     | 1.00083     | 3.87E-03    | 2.15E-02     |
| AN08       | 0.0053786  | 0.585633    | 0.000286363 | 0.0311761   | 0.668587   | 0.458632  | 1.41476  | 0.947504  | 1.45735   | 0.816553   | 0.954939 | 0.890626  | 0.648481   | 1.29575     | 0.0099654   | 0.0463866    |
| CD226      | 0.0453382  | 0.0383845   | 0.00292798  | 0.0037845   | 0.0918451  | 0.152844  | 1.54971  | 0.652754  | 2.2563    | 0.858376   | 1.53213  | 0.577957  | 3.99776    | 2.4301      | 1.52E-13    | 1.46E-11     |
| AHRH       | 4.93E-05   | 0.000454801 | 7.83E-05    | 0.00151863  | 2.67E-05   | 0.0202052 | 1.7016   | 0.616542  | 1.63431   | 0.614336   | 1.6939   | 0.790912  | 0.614884   | 1.14688     | 5.85E-04    | 4.59E-03     |
| AC007639.1 | 0.00094916 | 0.453371    | 0.00354623  | 0.00445649  | 0.0160581  | 0.153311  | 1.71587  | 0.890429  | 1.41016   | 0.742814   | 1.49826  | 0.831918  | 1.72446    | 1.06281     | 0.00639772  | 0.0049292    |
| SILCA4     | 3.91E-02   | 0.884789    | 9.58E-05    | 2.05E-03    | 2.14E-01   | 0.0260426 | 1.82936  | 0.970944  | 1.67703   | 0.640865   | 1.19485  | 0.673148  | 0.60455    | 1.17115     | 0.00280904  | 0.0165431    |
| SECTM1     | 7.74E-05   | 0.0741765   | 0.0105874   | 0.291886    | 0.569507   | 0.106964  | 1.48154  | 1.40952   | 0.877685  | 1.03692    | 0.754916 | 1.42806   | 0.936017   | 0.655444    | 0.0421514   | 0.145896     |
| CA4        | 0.0198649  | 0.110305    | 0.00126367  | 0.014333    | 0.00808135 | 0.761836  | 1.958    | 0.567383  | 2.17619   | 1.03372    | 2.73737  | 1.17579   | 0.569679   | 0.840851    | 0.0320201   | 0.117859     |

Table S3 related to Fig.1 : Psoriasis-relevant genes regulated by ex vivo ligation of AhR in human skin

FC: Fold change; Ag: Agonist; Ant: Antagonist; H: Healthy; L: lesional psoriasis skin; NL: non-lesional psoriasis skin; p: p value; FDR: False Discovery Rate

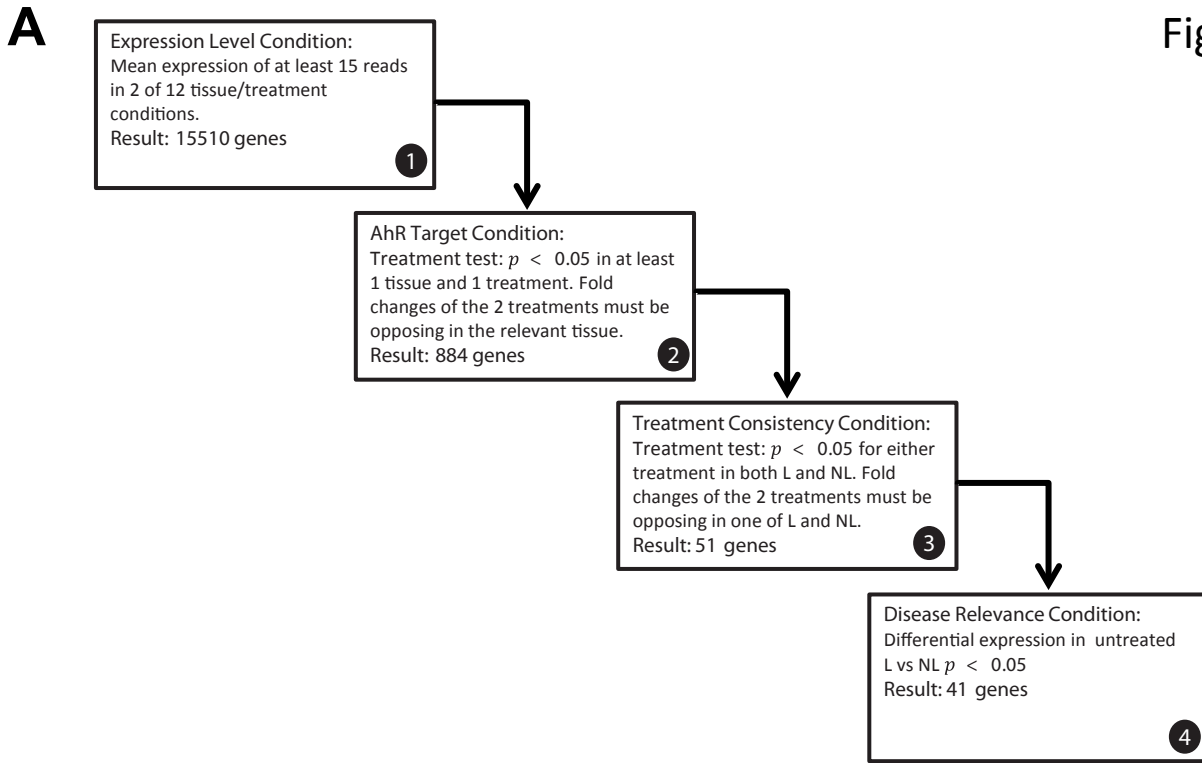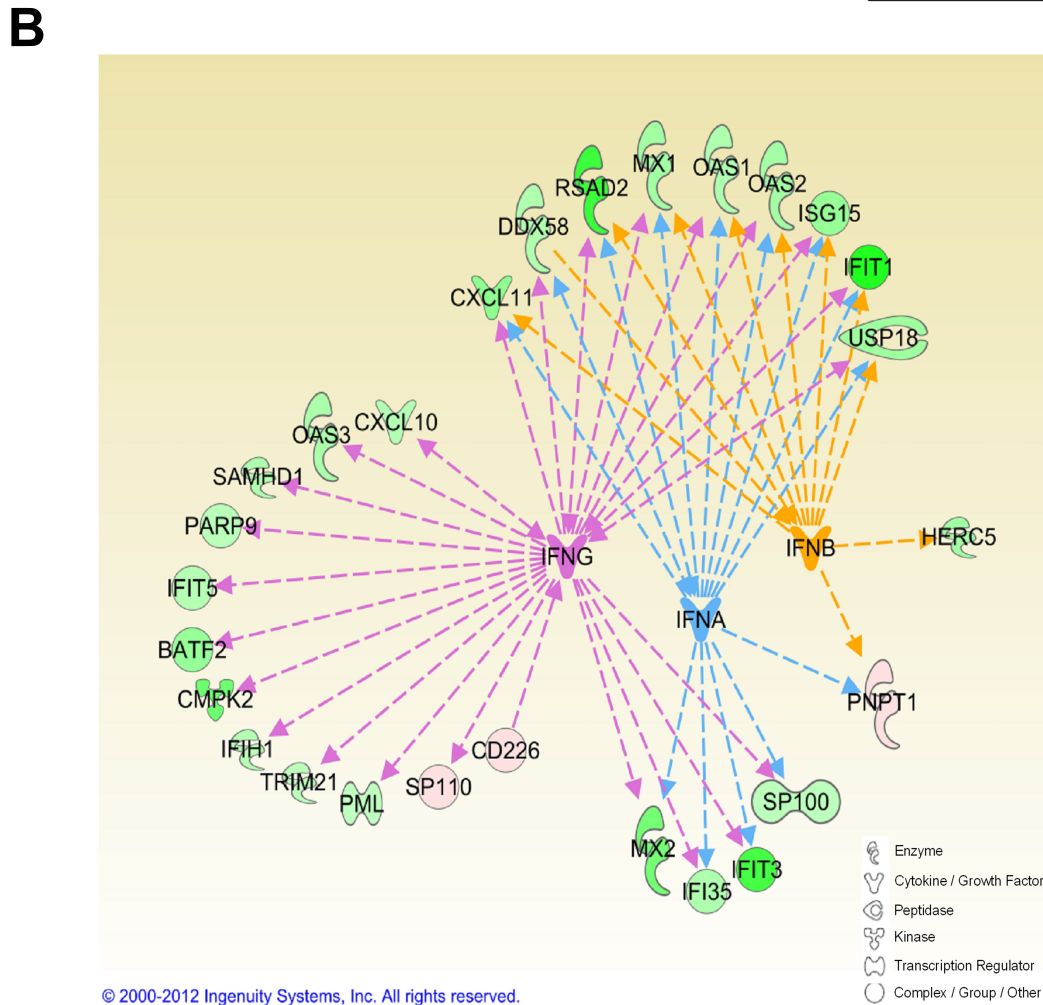

**Figure S1 related to Fig.1:** (A) Flow chart showing filtering criteria for RNA sequencing gene expressing analysis. (B) Network showing the molecular relationships between gene products modulated by AhR agonist in lesional skin. Genes are represented as nodes and their biological relationship is represented as an edge; the intensity of the node colour indicates the degree of up- (red) or down- (green) regulation

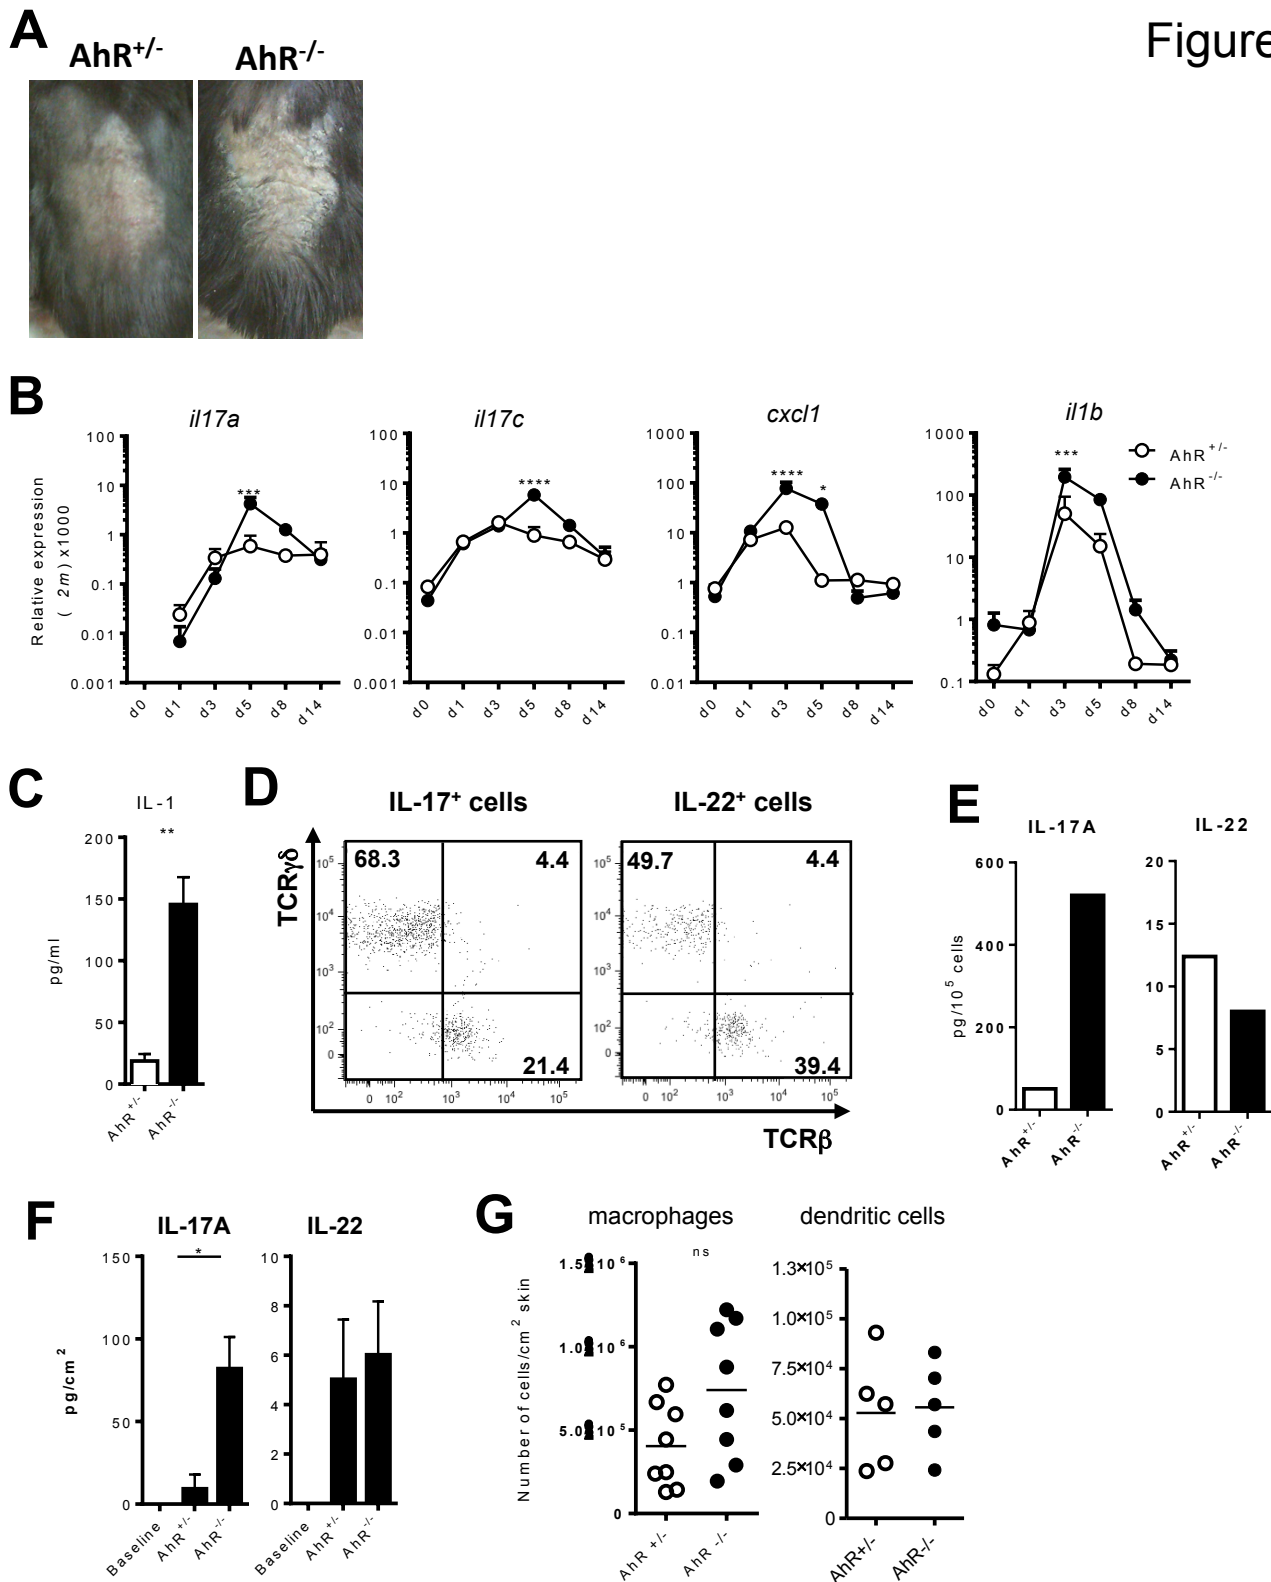

**Figure S2 related to Fig.2:** (A) Back skin of imiquimod-treated  $AhR^{+/-}$  and  $AhR^{-/-}$  mice 5 days after treatment initiation. (B) Kinetics of proinflammatory gene expression in whole-skin from imiquimod-treated  $AhR^{+/-}$  and  $AhR^{-/-}$  mice. (C) IL-1 $\beta$  protein levels from Pdbu/Ionomycin-restimulated skin cell suspension from day 5 imiquimod-treated mice. (D) FACS dot plot showing expression of TCR $\beta$  and TCR $\gamma\delta$  in IL-17 (left) and IL-22 (right) - expressing cells in the skin of day 5 imiquimod-treated  $AhR^{+/-}$  mice. (E) IL-17A and IL-22 protein levels produced by Pdbu/Ionomycin-restimulated FACS-sorted eYFP from day 5 imiquimod-treated IL-17A fate reporter mice. (F) IL-17A and IL-22 protein levels on whole skin lysates from day 5 imiquimod-treated mice. (G) Number of macrophages (CD11b<sup>+</sup>F4/80<sup>+</sup>) and dendritic cells (CD11c<sup>+</sup>) found in imiquimod-treated skin on day 5 after initiating treatment.

Figure S3

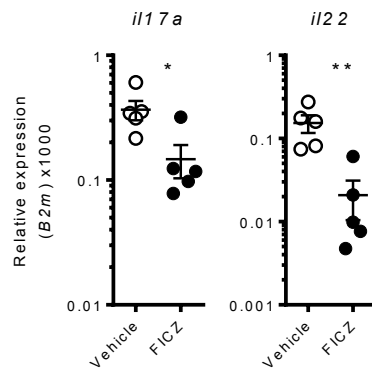

**Figure S3 related to Fig.3:** mRNA expression of *il17a* and *il22* in skin of imiquimod-treated mice with or without daily FICZ administration on day 5 after initiating treatment.



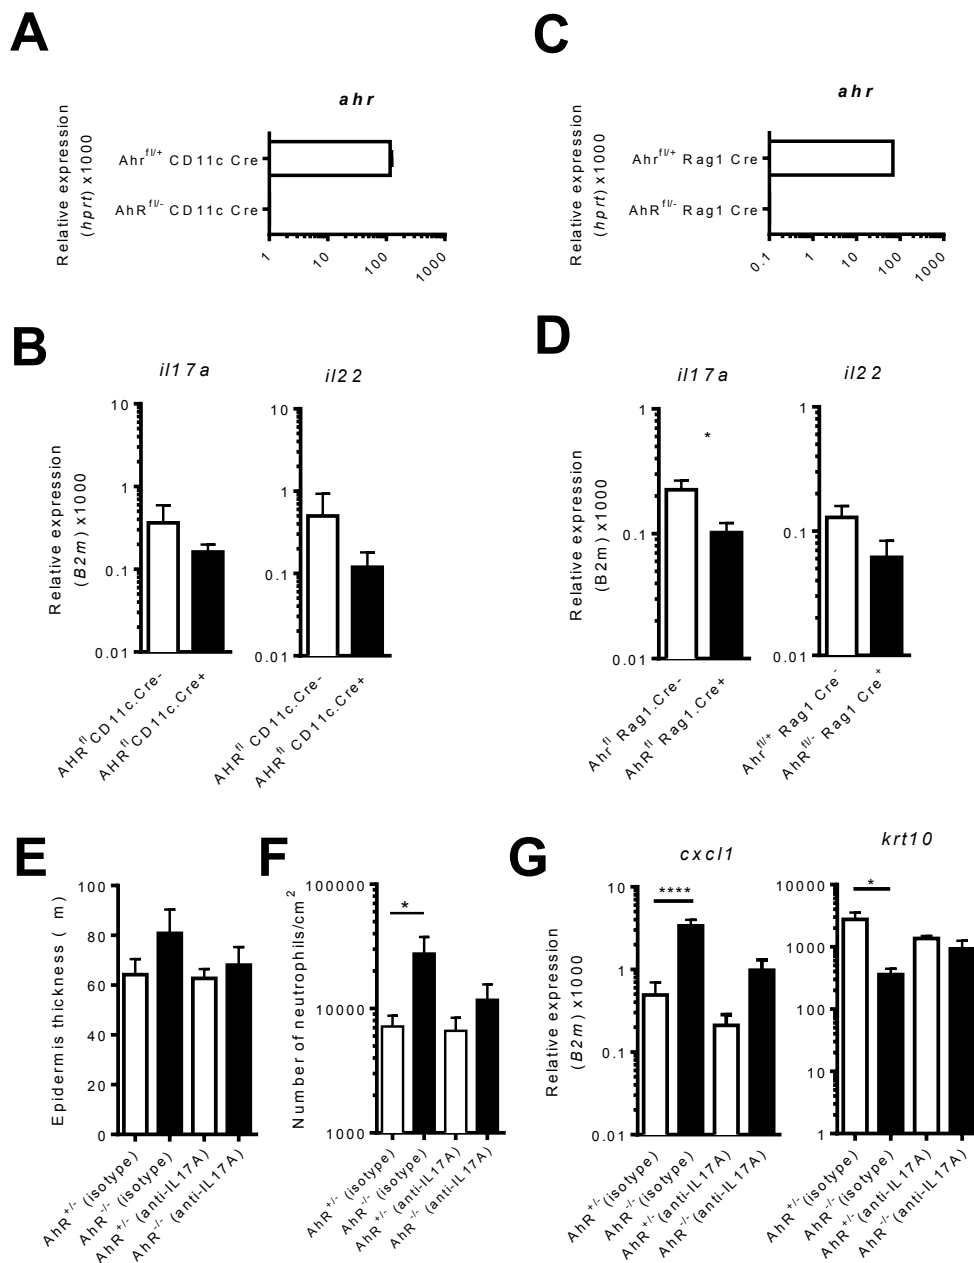

**Figure S4 related to Fig.4:** (A) qPCR showing deletion of AhR in sorted dendritic cells from *Ahr<sup>fl</sup>CD11c.Cre* mice. (B) mRNA expression of *il17a* and *il22* in skin of imiquimod-treated *Ahr<sup>fl</sup>CD11c.Cre* mice on day 5 after initiating treatment. (C) qPCR showing deletion of AhR in sorted T cells from *Ahr<sup>fl</sup>CD11c.Cre* mice. (D) mRNA expression of *il17a* and *il22* in skin of imiquimod-treated *Ahr<sup>fl</sup>Rag1.Cre* mice on day 5 after initiating treatment. (E) Quantification of epidermal thickness of imiquimod-treated *Ahr<sup>+/-</sup>* and *Ahr<sup>-/-</sup>* mice treated with either isotype or anti-IL-17A antibody, on day 5 after initiating treatment. (F) Number of neutrophils per cm<sup>2</sup> of skin as determined by FACS analysis of Ly6G<sup>+</sup> cells in imiquimod-treated *Ahr<sup>+/-</sup>* and *Ahr<sup>-/-</sup>* mice treated with either isotype or anti-IL-17A antibody. (G) mRNA expression of *cxcl1* and *krt10* in skin of imiquimod-treated *Ahr<sup>+/-</sup>* and *Ahr<sup>-/-</sup>* mice treated with either isotype or anti-IL-17A antibody. \* p<0.05.

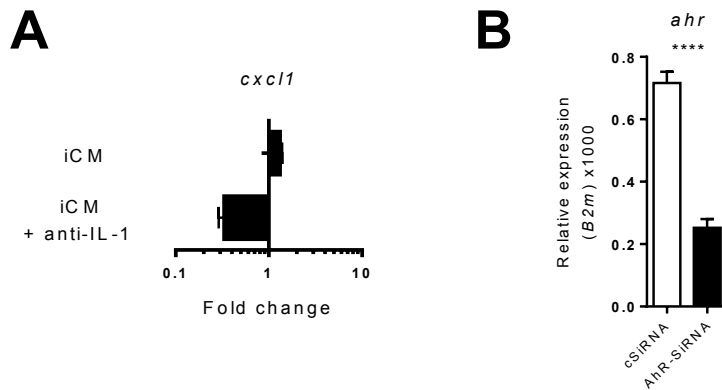

**Figure S5 related to Fig.6:** (A) *cxc11* mRNA expression in AhR-deficient keratinocytes stimulated for 24 hours with iCM in the presence or absence of neutralizing anti-IL-1 $\beta$  (10 mg/ml). Data are expressed as fold change over keratinocytes stimulated with in-vitro-reactivated skin cells obtained from naïve wild-type mice. Plots show mean  $\pm$  SEM.  $n = 2-3$  wells per group. (B) *ahr* mRNA expression in human primary keratinocytes, transiently transfected for 48 hours with a non-targeting control SiRNA (cSiRNA, white bars) or in which AhR was transiently silenced (AhR-SiRNA, black bars) and stimulated for further 24 hours with human recombinant IL-1 $\beta$ (10 ng/ml).

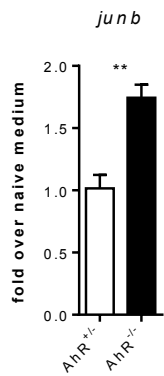

**Figure S6 related to Fig.7:** (A) *Junb* mRNA expression in AhR<sup>+/-</sup> (white bars) and AhR<sup>-/-</sup> (black bars) keratinocytes stimulated for 24 hours with conditioned medium from in-vitro-reactivated skin cells obtained from IMQ-treated wild-type mice. Data expressed as fold change over stimulation with medium conditioned by in-vitro-reactivated skin cells obtained from naïve wild-type mice. Results from one representative experiment of three independent experiments are shown.

## Supplemental Experimental Procedures related to Experimental Procedures

**Human skin biopsies culture:** Psoriasis skin biopsies were quartered and one quarter of each was stored in RNA-later (Life Technologies) at 4°C until further use. The remaining three quarters were cultured with either 0.1% DMSO (vehicle control), the AhR agonist FICZ (250 nM) or the AhR antagonist CH-2233191 (3 µM) in IMDM (Sigma) containing 2% Pen-Strep-Gln solution (Sigma) and 10% knockout Serum replacement factor (Life Technologies) at 37°C in humidified 5% CO<sub>2</sub>/95% air for 16h. Individual skin biopsies from healthy donors were processed in the same ways as those of patients.

**Animals:** Mice were bred in the NIMR animal facility under specified pathogen free conditions. All animal experiments were done according to institutional guidelines and Home Office regulations. C57Bl/6, B6.CD45.1, *Ahr*<sup>-/-</sup> (Schmidt et al., 1996) (Jackson Stock 002727 B6;129-<sup>AhRtm3.1Bra/J</sup>), *Rag1.Cre*(McCormack et al., 2003), *Cd11c.Cre* (Jackson stock 008068 B6.Cg-Tg(<sup>I<sup>tgax-cre</sup></sup>))1-1Reiz/J(Caton et al., 2007), *Ahr*<sup>fl/fl</sup> (Jackson Stock 006203 B6.129(FVB-*Ahr*<sup>tm3.1Bra/J</sup>), B6.*Rag1*<sup>-/-</sup> and *Ahr*<sup>-/-</sup>*Rag1*<sup>-/-</sup> mice were used in this study. Mice were bred in the NIMR animal facility under specified pathogen free conditions. All animal experiments were done according to institutional guidelines and Home Office regulations.

**Generation of BM chimeras:** BM cells were obtained from femurs and tibias of donor mice. Sub-lethally irradiated *Rag1* deficient recipient mice were reconstituted by intravenous injection of 1x10<sup>7</sup> BM cells.

**RNA isolation and Quantitative RT-PCR (qRT-PCR):** Total RNA was obtained using the Mirvana Kit (Life Technologies) (human skin), or a Polytron PT 3000 tissue homogenizer

(Kinematika) along with TRIzol (Life technologies) (mouse skin) or RNeasy Mini Plus Kit (Qiagen) (*in vitro* cultured KCs), each according to the manufacturer's instructions. mRNA was reverse transcribed into cDNA and gene expression was assessed by quantitative RT-PCR using Taqman assays (Life technologies) according to the manufacturers' instructions. For each sample, mRNA abundance was normalized to the amount of Human acidic ribosomal protein (*HuPO*) or mouse beta 2-microglobulin ( $\beta 2m$ ). Data analysis was performed using either the  $\Delta\Delta C_t$  method and results are expressed as agonist or antagonist fold change versus vehicle control (human skin samples), or the  $\Delta C_t$  method and results are expressed as mRNA relative expression to  $\beta 2m \times 1000$  in arbitrary units (mouse skin samples), or the  $\Delta\Delta C_t$  method and results for each genotype are expressed as fold change over respective conditioned medium from naïve mice (*in vitro* keratinocytes).

#### **cDNA Libraries preparation:**

cDNA libraries were prepared using the Illumina TruSeq™ RNA sample preparation kit (Low-Throughput protocol) according to manufacturer's instructions. Briefly, 500µg of total RNA sample was used for poly-A mRNA selection using streptavidin-coated magnetic beads. The resulting RNA sample was subjected to thermal mRNA fragmentation using Elute, Prime, Fragment Mix from the kit. cDNA was synthesized from enriched and fragmented RNA using reverse transcriptase Super-Script II (Life technologies) according to manufacturer's instructions. The cDNA was further converted into double stranded DNA using the reagents supplied in the kit. The resulting dsDNA was subjected end-repair, dA-tailing, ligation of platform-specific adaptors, purification reactions and library amplification (15 cycles).

**RNA-sequencing** (Accession number GSE47944)

Libraries were barcoded and run 4 per lane on an Illumina HiSeq 2000. Sequencing yielded an average of 35 million paired end reads per library. Read pairs were mapped to the Ensembl Human GRCh37 transcriptome using bowtie with the options "-v 3 -a --best -y -I 0 -X 10000". Any read pair mapping only to one or more transcripts of a gene constituted a unique gene count, and any read pair mapping to transcripts of different genes was discarded. On average 60.5% of reads produced unique mappings. Read counts were normalised by the total unique mapping reads per library.

### RNA sequencing differential expression analysis

We tested for the influence of AhR agonist and antagonist whilst controlling for any tissue culture effect. We first estimate the perturbation due to culture (if any), then we estimate the fold change and significance of the AhR treatment beyond that of the culture. Let  $g_{ijkp}$  be the normalised count of gene  $i$  in tissue  $j = \{\text{L, NL, N}\}$  under treatment  $k = \{\text{U} = \text{Untreated, C} = \text{DMSO, T} = \text{AhR Agonist/Antagonist}\}$  in patient  $p$ , we assume  $g_{ijkp}$  is negative binomially distributed (Cameron and Trivedi, 1998) with mean  $\mu_{ijk}$  and variance  $\mu_{ijk} + \alpha_{ij}\mu_{ijk}^2$ , with  $\alpha_{ij}$  the dispersion parameter for gene  $i$  in tissue  $j$ . We consider the null hypothesis a gene's expression is the result of the mean untreated expression and any culture effects:  $\log \mu_{ijk} = \mu_{ij} + x_{Ck}\beta_{Cij}$ ; and the alternative hypothesis that a gene's expression is due to mean untreated expression, culture and treatment effects:  $\log \mu_{ijk} = \mu_{ij} + x_{Ck}\beta_{Cij} + x_{Tk}\beta_{Tij}$ . Where,  $\mu_{ij}$  is the mean untreated expression;  $\beta_{Cij}$  and  $\beta_{Tij}$  are the log fold changes due to culture and treatment respectively;  $x_{Ck} = 1$  when  $k = C, T$  and 0 otherwise;  $x_{Tk} = 1$  when  $k = T$  and 0 otherwise. We compute maximum likelihood estimates of parameters  $\alpha_{ij}, \mu_{ij}, \beta_{Cij}$  under the null, and similarly estimates of  $\alpha_{ij}, \mu_{ij}, \beta_{Cij}, \beta_{Tij}$  under the alternative hypothesis. We perform a likelihood ratio test: if  $\ell_N$  and  $\ell_A$  are the log-

likelihoods of the null and alternative models respectively then the test statistic  $-2(\ell_N - \ell_A)$  is assumed  $\chi^2_1$  distributed under the null hypothesis. We apply the test to the 15510 genes that have a mean expression of at least 15 reads in 2 of the 12 tissue/treatment combinations. We select the genes for which we reject the null with  $p < 0.05$  in any treatment and tissue, we further require the treatment fold changes must be opposing in the relevant tissue (i.e.  $\beta_{Tij}$  must have different signs for agonist and antagonist). This results in 884 AhR-modulated genes (Fig. 1A). We next filtered for consistency of treatment by requiring one of the two treatments to be significant in both lesional (L) and non-lesional(NL), and that the treatment fold changes must be opposing in one of these two tissues. This results in 51 genes of which we select the 41 most likely to be disease relevant by retaining those differentially expressed in an Untreated L v NL comparison with  $p < 0.05$  determined by DESeq (Anders and Huber, 2010).

### **Microarray gene expression analysis (Accession number GSE47607)**

Total RNA was used for the Affymetrix sample preparations (Affymetrix) according to the manufacturer's instructions. Three biological repeats were hybridized to GeneChip Mouse Genome 430 2.0 Arrays. Microarray data were RMA normalized using the R package affy (Bolstad *et al.*, 2003) that is a part of the Bioconductor project (<http://www.bioconductor.org>). Fold changes were calculated as  $2^{|SLR|}$  if  $SLR > 0$  and  $-2^{|SLR|}$  if  $SLR < 0$ , where SLR is the average signal log ratio over the biological replicates. The R package RankProd (Hong *et al.*, 2006) was used to identify regulated genes. Genes having the estimated percentage of false positive predictions  $pfp < 0.01$  and fold change  $FC \geq 1.5$  were considered to be differentially expressed. The gene annotations were obtained from the NetAffx database (Liu *et al.*, 2003). Visualization was performed using Eisen's

Treeview(Eisen *et al.*, 1998). The microarray data were also analyzed for psoriasis associated genes using Ingenuity Pathways Analysis (Ingenuity® Systems, [www.ingenuity.com](http://www.ingenuity.com)).

**Keratinocyte cell culture:** For murine primary keratinocyte *in vitro* culture, tails and shaved dorsal mouse skin were processed by mechanical removal of subcutaneous fat tissue and floated on 0.5% w/v trypsin (Sigma) for 1 h at 37°C. Epidermal sheets were mechanically separated and suspended in high calcium medium (EMEM medium (Lonza) with 8% calcium-chelated fetal calf serum, 2% Pen-Strep-Gln solution (Sigma) (cEMEM) and 1.3mM CaCl<sub>2</sub>), submitted to gentle vortexing for 1 min, filtered, and cells seeded in fibronectin- and collagen-coated (BD Biosciences and Life Technologies, respectively) 24-well plates at 3x10<sup>5</sup> cells/ml in medium-calcium medium (cEMEM supplemented with 0.2mM CaCl<sub>2</sub>). The following day non-adherent cells were washed away with PBS and cells cultured in low-calcium medium (cEMEM supplemented with 0.05 mM CaCl<sub>2</sub>). Cells were expanded until reaching 70% confluence and then stimulated with conditioned media (see below) or 10ng/ml IL-1β (R&D Systems), with or without 1 μM Tanshinone IIA (Enzo) for 24 hours.

Human primary keratinocyte were isolated from discarded healthy skin as previously described (Laggner *et al.*, 2011) and cultured in KGM medium (KBM medium, supplemented with KGM-bullet kit, both Lonza) for 2-3 passages. For transient silencing of AhR, cells were seeded in 24-well plates at 35x10<sup>4</sup> cells/ml and cultured until 65% confluent. Cells were then transfected with 33nM ON-TARGETplus SMARTpool siRNA for human AhR or with ON-TARGETplus Non-targeting siRNA (both Thermo Fisher Scientific Biosciences) using Lipofectamine 2000 (Life Technologies) in KBM medium. Forty-eight hours later, medium was replaced with KGM and cells were stimulated with 10ng/ml human IL-1β for further 24 hours. The human keratinocyte HaCaT cell line, in which AhR had been stable silenced (AhR-silenced HaCaT) or which had been transfected with an empty vector (EV-HaCaT)



(Fritsche et al., 2007), were cultured in DMEM medium supplemented with 10% fetal bovine serum, 2% Pen-Strep-Gln solution, 1 mM sodium pyruvate, 800 µg/ml geneticin (Sigma). Cells were seeded in 24-well plates at  $5 \times 10^4$  cells/ml and stimulated the following day with 10ng/ml human IL-1 $\beta$  for 24 hours.

***In vivo* IL-17a blockade in the imiquimod model of psoriasiform-like skin inflammation:**

*Ahr*<sup>+/-</sup> and *Ahr*<sup>-/-</sup>, treated daily for 5 consecutive days with IMQ, received 500 µg/mouse anti-IL-17a antibody or isotype control (both BioXcell) intraperitoneally on the day the IMQ treatment was started and then on day 3 of treatment.

**Supplementary References**

- Anders, S., and Huber, W. (2010). Differential expression analysis for sequence count data. *Genome Biol* *11*, R106.
- Bolstad, B.M., Irizarry, R.A., Astrand, M., and Speed, T.P. (2003). A comparison of normalization methods for high density oligonucleotide array data based on variance and bias. *Bioinformatics* *19*, 185-193.
- Cameron, A.C., and Trivedi, P.K. (1998). *Regression Analysis of Count Data* (Cambridge University Press).
- Caton, M.L., Smith-Raska, M.R., and Reizis, B. (2007). Notch-RBP-J signaling controls the homeostasis of CD8- dendritic cells in the spleen. *The Journal of experimental medicine* *204*, 1653-1664.
- Eisen, M.B., Spellman, P.T., Brown, P.O., and Botstein, D. (1998). Cluster analysis and display of genome-wide expression patterns. *Proc Natl Acad Sci U S A* *95*, 14863-14868.
- Fritsche, E., Schafer, C., Calles, C., Bernsmann, T., Bernshausen, T., Wurm, M., Hubenthal, U., Cline, J.E., Hajimiragha, H., Schroeder, P., *et al.* (2007). Lightening up the UV response by identification of the arylhydrocarbon receptor as a cytoplasmatic target for ultraviolet B radiation. *Proc Natl Acad Sci U S A* *104*, 8851-8856.
- Hong, F., Breitling, R., McEntee, C.W., Wittner, B.S., Nemhauser, J.L., and Chory, J. (2006). RankProd: a bioconductor package for detecting differentially expressed genes in meta-analysis. *Bioinformatics* *22*, 2825-2827.
- Laggner, U., Di Meglio, P., Perera, G.K., Hundhausen, C., Lacy, K.E., Ali, N., Smith, C.H., Hayday, A.C., Nickoloff, B.J., and Nestle, F.O. (2011). Identification of a novel proinflammatory human skin-homing Vgamma9Vdelta2 T cell subset with a potential role in psoriasis. *J Immunol* *187*, 2783-2793.
- Liu, G., Loraine, A.E., Shigeta, R., Cline, M., Cheng, J., Valmееkam, V., Sun, S., Kulp, D., and Siani-Rose, M.A. (2003). NetAffx: Affymetrix probesets and annotations. *Nucleic Acids Res* *31*, 82-86.
- McCormack, M.P., Forster, A., Drynan, L., Pannell, R., and Rabbitts, T.H. (2003). The LMO2 T-cell oncogene is activated via chromosomal translocations or retroviral insertion during gene therapy but has no mandatory role in normal T-cell development. *Mol Cell Biol* *23*, 9003-9013.
- Schmidt, J.V., Su, G.H., Reddy, J.K., Simon, M.C., and Bradfield, C.A. (1996). Characterization of a murine Ahr null allele: involvement of the Ah receptor in hepatic growth and development. *Proc Natl Acad Sci U S A* *93*, 6731-6736.
